# Supplementary material for: Enhanced mechanical properties of hBN–ZrO2 composites and their biological activities on Drosophila melanogaster: synthesis and characterization
Source: Royal Society of Chemistry journal article supplement (doi:10.1039/c9ra07835e), 2019-01-01
Supplement: c9ra07835e1.pdf [file c9ra07835e1.pdf]

## Enhanced mechanical properties of hBN-ZrO<sub>2</sub> composites and their biological activities on *Drosophila melanogaster*: Synthesis and characterizations

Amarendra Gautam<sup>a</sup>, Chandkiram Gautam<sup>a\*</sup>, Monalisa Mishra<sup>b</sup>, Vijay Kumar Mishra<sup>c</sup>, Ajaz Hussain<sup>a</sup>, Swetapadma Sahu<sup>b</sup>, Reetuparna Nanda<sup>b</sup>, Bikash Kisan<sup>b</sup>, Santoshkumar Biradar<sup>d</sup>, Rakesh Kumar Gautam<sup>e</sup>

<sup>a</sup>Advanced Glass and Glass Ceramics Research Laboratory,  
Department of Physics, University of Lucknow, Lucknow-226007 (India)

<sup>b</sup>Neural Developmental Biology Lab, Department of Life Science,  
National Institute of Technology, Rourkela, Odisha-769008 (India)

<sup>c</sup>Department of Physics, Institute of Science, Banaras Hindu University, Varanasi - 221005 (UP)  
(India)

<sup>d</sup>Department of Materials Science & Nano Engineering, Rice University, Houston, Texas, USA

<sup>e</sup>Department of Mechanical Engineering, Indian Institute of Technology, Banaras Hindu  
University, Varanasi - 221005 (UP) (India)

\*E-mail: gautam\_ceramic@yahoo.com

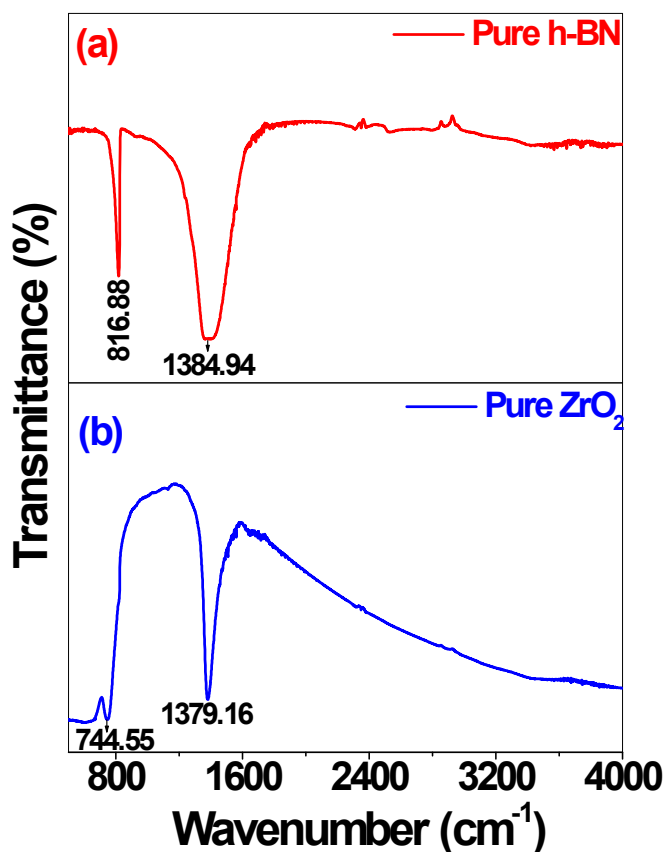

Fig. 1S: IR spectra of (a) pure hexagonal boron nitride (h-BN) and (b) pure zirconia (ZrO<sub>2</sub>) recorded at room temperature.

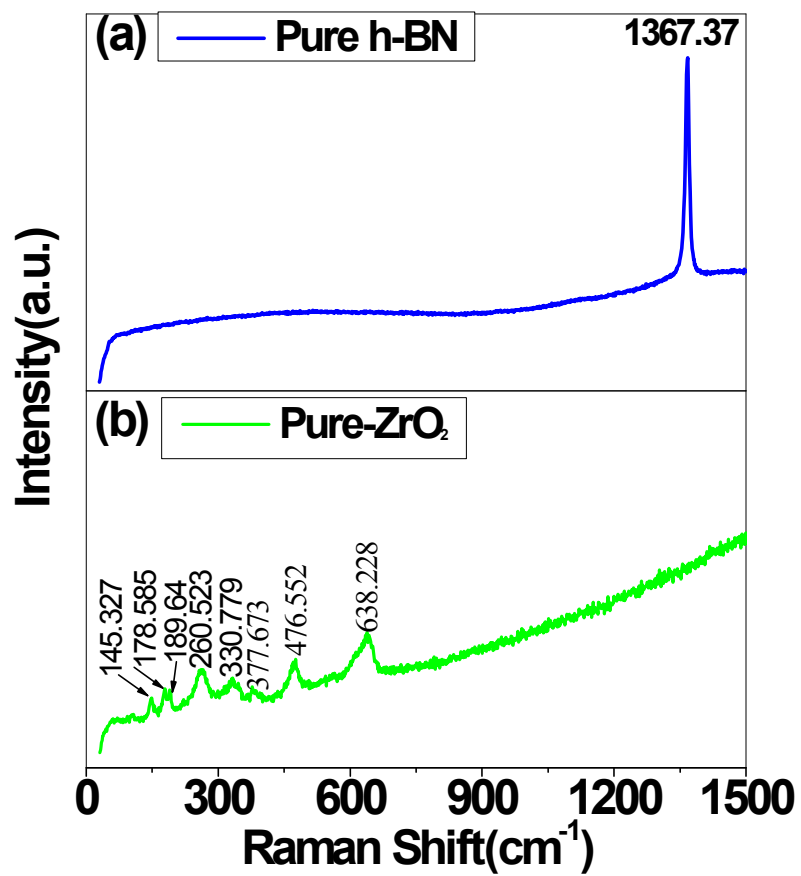

Fig. 2S: Raman spectrum of (a) pure hexagonal boron nitride (h-BN) and (b) pure zirconia (ZrO<sub>2</sub>) recorded at room temperature.

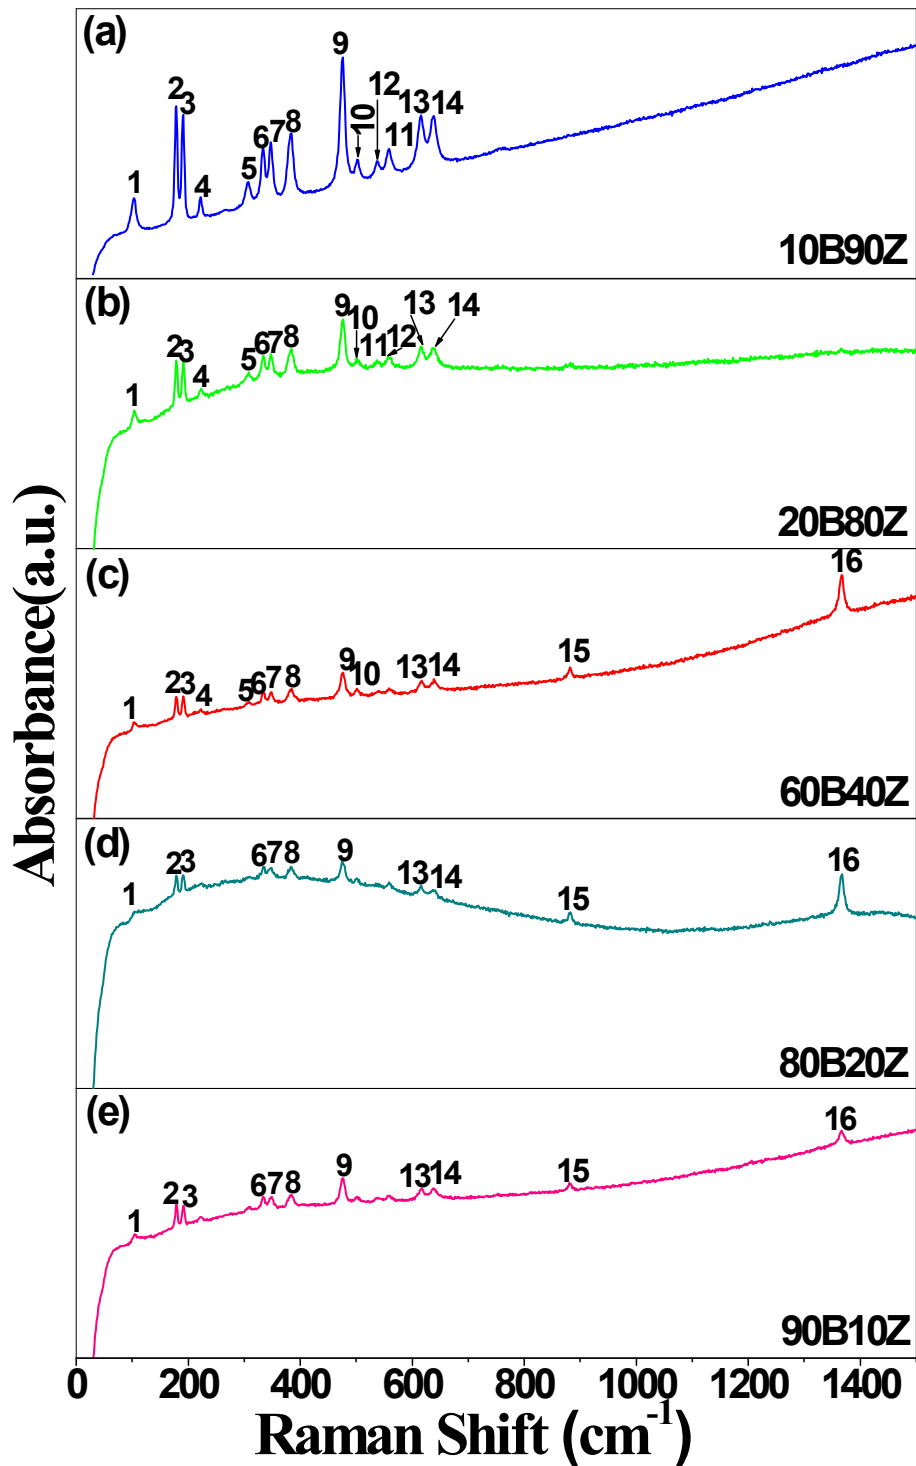

**Figure 3S.** Raman spectra of hBN-ZrO<sub>2</sub> composite samples (a) 10B90Z, (b) 20B80Z, (c) 60B40Z, (d) 80B20Z and (e) 90B10Z sintered at 1000 °C for 3 h.
